# Supplementary material
Source: MDPI journal article supplement (https://www.mdpi.com/1424-2818/12/6/223)
Supplement: s1 [file s1]

Supplementary material

# Brachyuran Crabs (Decapoda) Associated with Rhodolith Beds: Spatio-Temporal Variability at Gran Canaria Island

Clara Sánchez-Latorre<sup>1</sup>, Raúl Triay-Portella<sup>2,\*</sup>, Marcial Cosme<sup>1</sup>, Fernando Tuya<sup>1</sup>, and Francisco Otero-Ferrer<sup>1</sup>

<sup>1</sup> Grupo en Biodiversidad y Conservación, IU-ECOQUA, Universidad de Las Palmas de Gran Canaria, Marine Scientific and Technological Park, Crta. Taliarte s/n, 35214 Telde, Spain; clara10sanchez@hotmail.com (C.S.-L.); marcialcosmedesteban@gmail.com (M.C.); ftuya@yahoo.es (F.T.); [Francesco\\_25@hotmail.com](mailto:Francesco_25@hotmail.com) or fran.otero@fpct.ulpgc.es (F.O.-F.)

<sup>2</sup> Grupo en Ecología Marina Aplicada y Pesquerías, I-UNAT, Universidad de Las Palmas de Gran Canaria, Edificio Polivalente I, Parque Científico Tecnológico Campus Universitario de Tafira, 35017 Las Palmas de Gran Canaria, Spain

\* Correspondence: [emap.raul@gmail.com](mailto:emap.raul@gmail.com)

Received: 17 March 2020; Accepted: 27 May 2020; Published: date

## 1. Supplementary Tables

**Table S1.** Summary of the mixed-effects generalized linear model (GLM) testing the effects of the fixed factors “Depth” (18, 25, and 40 m) and “Season” (W: winter, Sp: spring, Sm: summer, Au: autumn) on the richness of epiphytic algal biomass. The contribution of “Year” was not presented, as this was a random source of variation. Reference values were 18 m for “Depth” and winter for “Season.”

|                              | Estimate | Std. Error | Z Value | Pr(> z )   |
|------------------------------|----------|------------|---------|------------|
| (Intercept)                  | 6.63943  | 0.42671    | 15.560  | <2e-16***  |
| Depth [25m]                  | 0.21135  | 0.60344    | 0.350   | 0.72615    |
| Depth [40m]                  | -2.31311 | 0.60444    | -3.827  | 0.00013*** |
| Season [Spring]              | 0.06014  | 0.60345    | 0.100   | 0.92062    |
| Season [Summer]              | -1.86098 | 0.60405    | -3.081  | 0.00206**  |
| Season [Autumn]              | 0.15243  | 0.60344    | 0.253   | 0.80058    |
| Depth [25m]: Season [Spring] | -0.38473 | 0.85341    | -0.451  | 0.65213    |
| Depth [40m]: Season [Spring] | 0.91614  | 0.85433    | 1.072   | 0.28356    |
| Depth [25m]: Season [Summer] | -0.15094 | 0.85421    | -0.177  | 0.85975    |
| Depth [40m]: Season [Summer] | 1.87590  | 0.85522    | 2.193   | 0.02827*   |
| Depth [25m]: Season [Autumn] | -0.53074 | 0.85341    | -0.622  | 0.53400    |
| Depth [40m]: Season [Autumn] | 0.41172  | 0.85447    | 0.482   | 0.62992    |

Significance codes: \*\*\*: < 0.001, \*\*: < 0.01, \*: < 0.05.

**Table S2.** Summary of the mixed-effects GLM testing the effects of the fixed factors “Depth” (18, 25 and 40 m) and “Season” (W: winter, Sp: spring, Sm: summer, Au: autumn) on the richness of *Pisa carinimana*. The contribution of “Year” was not presented, as this was a random source of variation. Reference values were 18 m for “Depth” and winter for “Season.”

|                              | Estimate | Std. Error | z value | Pr(> z ) |
|------------------------------|----------|------------|---------|----------|
| (Intercept)                  | 18.95    | 95.49      | 0.198   | 0.843    |
| Depth [25m]                  | 18.95    | 95.49      | 0.198   | 0.843    |
| Depth [40m]                  | 17.16    | 95.49      | 0.180   | 0.857    |
| Season [Spring]              | 18.07    | 95.49      | 0.189   | 0.850    |
| Season [Summer]              | 16.46    | 95.49      | 0.172   | 0.863    |
| Season [Autumn]              | 18.41    | 95.49      | 0.193   | 0.847    |
| Depth [25m]: Season [Spring] | -18.16   | 95.49      | -0.190  | 0.849    |
| Depth [40m]: Season [Spring] | -18.77   | 95.50      | -0.197  | 0.844    |
| Depth [25m]: Season [Summer] | -16.87   | 95.49      | -0.177  | 0.860    |
| Depth [40m]: Season [Summer] | -15.55   | 95.49      | -0.163  | 0.871    |
| Depth [25m]: Season [Autumn] | -19.80   | 95.49      | -0.207  | 0.836    |
| Depth [40m]: Season [Autumn] | -19.10   | 95.50      | -0.200  | 0.841    |

Significance codes: \*\*\*: < 0.001, \*\*: < 0.01, \*: < 0.05.

**Table S3.** Summary of the mixed-effects GLM testing the effects of the fixed factors “Depth” (18, 25, and 40 m) and “Season” (W: winter, Sp: spring, Sm: summer, Au: autumn) on the richness of *Achaeus cranchii*. The contribution of “Year” was not presented, as this was a random source of variation. Reference values were 18 m for “Depth” and winter for “Season.”

|                              | Estimate    | Std. Error  | Z Value | Pr(> z ) |
|------------------------------|-------------|-------------|---------|----------|
| (Intercept)                  | -2.5404435  | 1.1566001   | -2.196  | 0.0281*  |
| Depth [25m]                  | -0.0001416  | 1.4623629   | 0.000   | 0.9999   |
| Depth [40m]                  | 1.0783950   | 1.2125483   | 0.889   | 0.3738   |
| Season [Spring]              | 1.3569902   | 1.1773806   | 1.153   | 0.2491   |
| Season [Summer]              | -17.3019973 | 241.8415869 | -0.072  | 0.9430   |
| Season [Autumn]              | 1.4629584   | 1.1791669   | 1.241   | 0.2147   |
| Depth [25m]: Season [Spring] | 0.8619360   | 1.6229437   | 0.531   | 0.5954   |
| Depth [40m]: Season [Spring] | -2.3767960  | 1.6908257   | -1.406  | 0.1598   |
| Depth [25m]: Season [Summer] | 5.4694245   | 354.0188993 | 0.015   | 0.9877   |
| Depth [40m]: Season [Summer] | 16.2821626  | 241.8445020 | 0.067   | 0.9463   |
| Depth [25m]: Season [Autumn] | -0.3304714  | 1.6915675   | -0.195  | 0.8451   |
| Depth [40m]: Season [Autumn] | 0.1226274   | 1.3842303   | 0.089   | 0.9294   |

Significance codes: \*\*\*: < 0.001, \*\*: < 0.01, \*: < 0.05.

**Table S4.** Summary of the mixed-effects GLM testing the effects of the fixed factors “Depth” (18, 25, and 40 m) and “Season” (W: winter, Sp: spring, Sm: summer, Au: autumn) on the richness of *Pilumnus hirtellus*. The contribution of “Year” was not presented, as this was a random source of variation. Reference values were 18 m for “Depth” and winter for “Season.”

|                              | Estimate  | Std. Error | Z Value  | Pr(> z )       |
|------------------------------|-----------|------------|----------|----------------|
| (Intercept)                  | -22.69305 | 0.03040    | -746.368 | < 2e-16 ***    |
| Depth [25m]                  | 21.74687  | 0.03043    | 714.605  | < 2e-16 ***    |
| Depth [40m]                  | 0.16779   | 0.03049    | 5.504    | 0.000000037*** |
| Season [Spring]              | 0.08862   | 0.03050    | 2.906    | 0.00366 **     |
| Season [Summer]              | -0.26514  | 0.03051    | -8.690   | < 2e-16 ***    |
| Season [Autumn]              | 20.36078  | 0.03045    | 668.657  | < 2e-16 ***    |
| Depth [25m]: Season [Spring] | -0.77404  | 0.03050    | -25.379  | < 2e-16 ***    |
| Depth [40m]: Season [Spring] | 0.09359   | 0.03152    | 2.969    | 0.00299 **     |
| Depth [25m]: Season [Summer] | -1.10894  | 0.03051    | -36.348  | < 2e-16 ***    |
| Depth [40m]: Season [Summer] | 0.45390   | 0.03152    | 14.399   | < 2e-16 ***    |
| Depth [25m]: Season [Autumn] | -20.64478 | 0.03049    | -677.07  | < 2e-16 ***    |
| Depth [40m]: Season [Autumn] | 1.20800   | 0.03049    | 39.625   | < 2e-16 ***    |

Significance codes: \*\*\*: < 0.001, \*\*: < 0.01, \*: < 0.05.

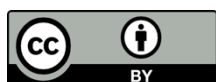

© 2020 by the authors. Submitted for possible open access publication under the terms and conditions of the Creative Commons Attribution (CC BY) license (<http://creativecommons.org/licenses/by/4.0/>).
